# Supplementary material
Source: PubMed Central journal article supplement (PMC3272234)
Supplement: cc1101_0109SD1.pdf [file cc1101_0109SD1.pdf]

## **Supplementary Figure 1**

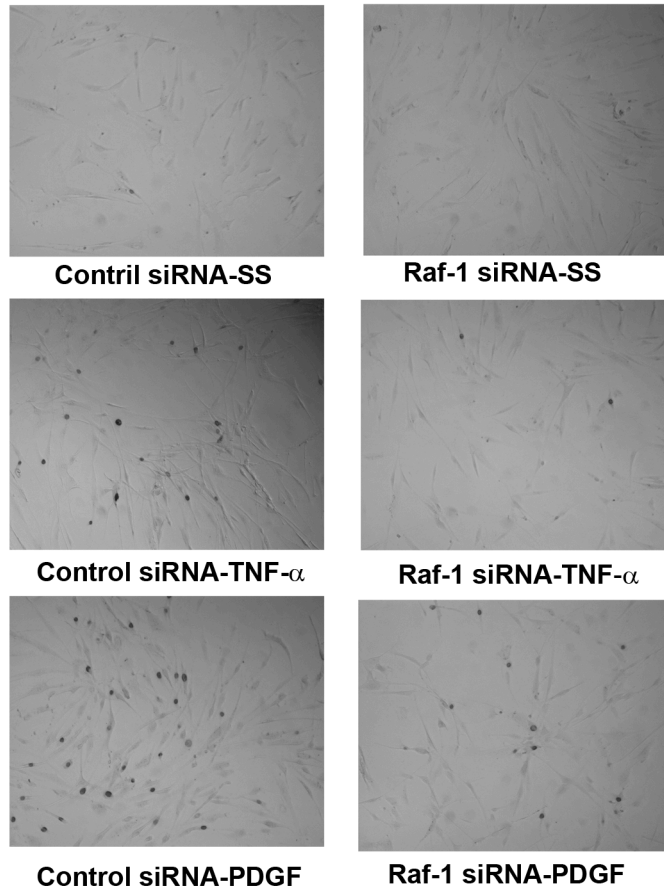

Supplementary Figure 1. Representative images of AoSMCs showing BrdU incorporation after Raf-I depletion and TNF- $\alpha$  and PDGF stimulation. A non-targeting siRNA was used as control. Data is shown as graph in Figure 3D.

**Supplementary Figure 2**

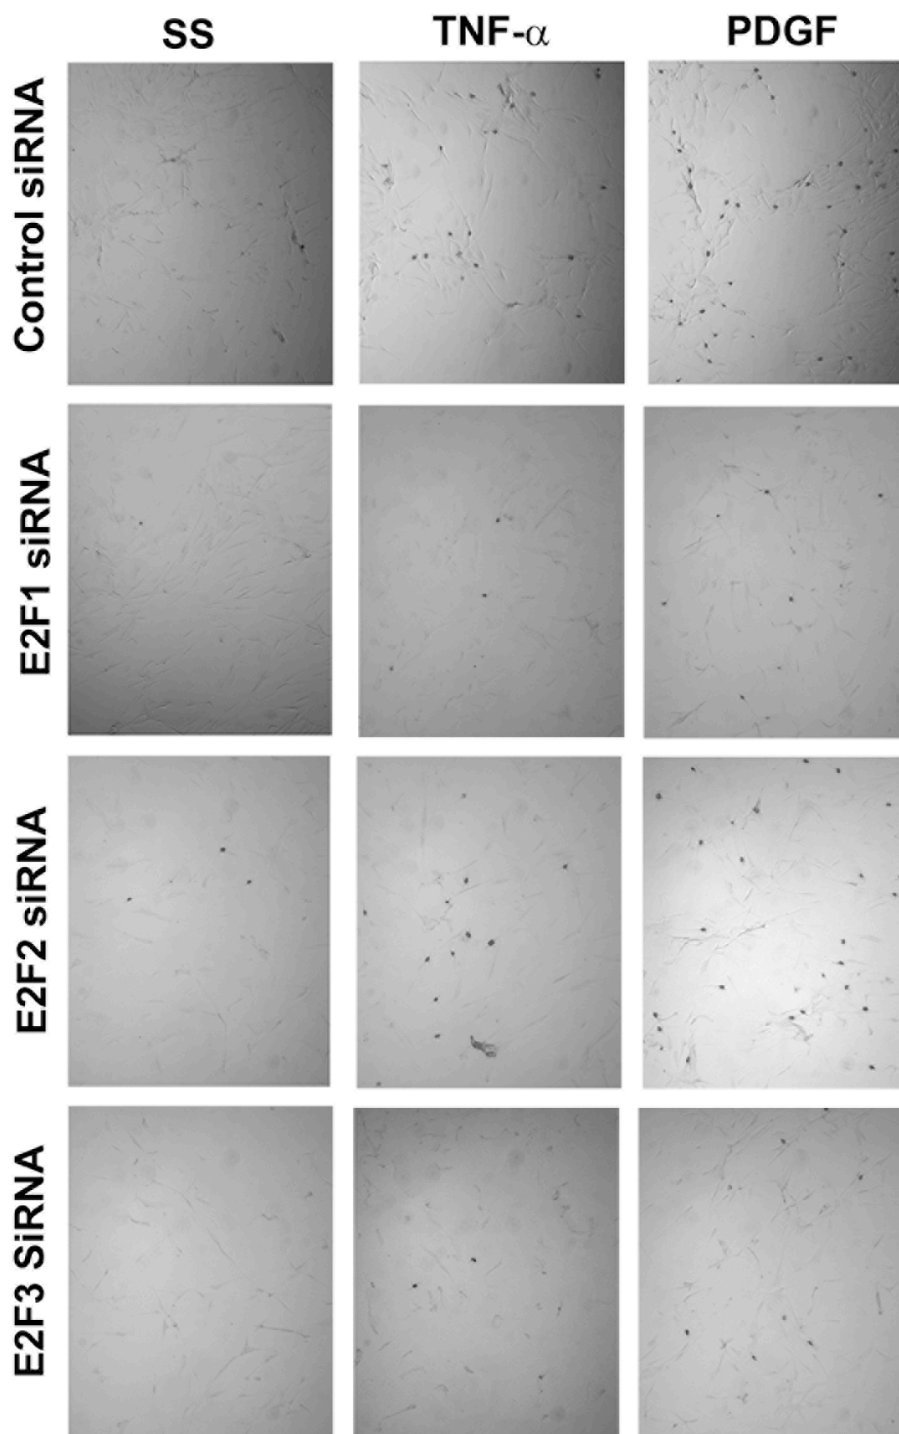

Supplementary Figure 2. Representative images of AoSMCs showing BrdU incorporation after E2F1, E2F2, E2F3 depletion using siRNAs and TNF- $\alpha$  and PDGF stimulation. A non-targeting siRNA was used as control. Data is shown as graph in Figure 6D.
